# Supplementary material for: Variations of the 630.0 nm airglow emission with meridional neutral wind and neutral temperature around midnight
Source: Copernicus journal article supplement (doi:10.5194/angeo-36-1471-2018), 2018-10-26
Supplement: Supplementary file 1 [file angeo-36-1471-2018-supplement.pdf]

Supplement of Ann. Geophys., 36, 1471–1481, 2018  
<https://doi.org/10.5194/angeo-36-1471-2018-supplement>  
© Author(s) 2018. This work is distributed under  
the Creative Commons Attribution 4.0 License.

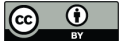

*Supplement of*

## **Variations of the 630.0 nm airglow emission with meridional neutral wind and neutral temperature around midnight**

**Chih-Yu Chiang et al.**

*Correspondence to:* Chih-Yu Chiang ([johnson@phys.ncku.edu.tw](mailto:johnson@phys.ncku.edu.tw))

The copyright of individual parts of the supplement might differ from the CC BY 4.0 License.

## Supplement

### I. Chemical process

$$\text{Photo-Chemical Reaction: } \frac{\partial n}{\partial t} + \bar{\nabla} \cdot (n\bar{v}) = P - L$$

n: density,

P: production rate

L: Loss rate

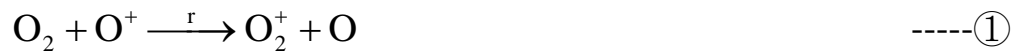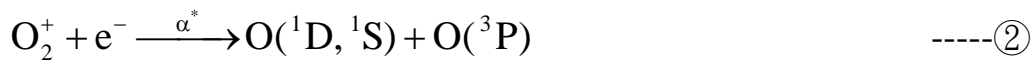

Where r and  $\alpha^*$  are rate coefficients of Reactions  $\textcircled{1}$  and  $\textcircled{2}$  respectively.

Consider the P and L of  $\text{O}_2^+$ :  $P_{\text{O}_2^+} = r[\text{O}_2][\text{O}^+]$ ,  $L_{\text{O}_2^+} = \alpha^*[\text{O}_2^+][e^-]$

$$\text{Steady State: } \frac{d[\text{O}_2^+]}{dt} = 0 = P_{\text{O}_2^+} - L_{\text{O}_2^+} = r[\text{O}_2][\text{O}^+] - \alpha^*[\text{O}_2^+][e^-]$$

$$\Rightarrow [\text{O}_2^+] = \frac{r[\text{O}_2][\text{O}^+]}{\alpha^*[e^-]} \quad \text{-----} \textcircled{3}$$

$$\text{From } \textcircled{2} \Rightarrow P_{\text{O}(^1\text{D})} = \mu_{\text{D}} \alpha^*[\text{O}_2^+][e^-] \quad \text{-----} \textcircled{4}$$

$\mu_{\text{D}}$  is the quantum yield

$$\text{Substitute } \textcircled{3} \text{ into } \textcircled{4} \Rightarrow P_{\text{O}(^1\text{D})} = \mu_{\text{D}} r[\text{O}_2][\text{O}^+]$$

Triple state but just 2 red lines because J=2 to J=0 is not allow (from selection rule of quantum mechanism).

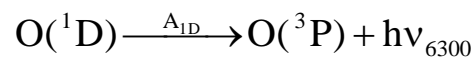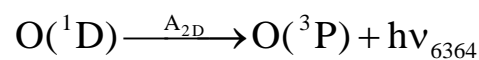

If  $\text{O}(^1\text{D})$  undergoes collisions with neutral particles, it will lose energy,

named Quenching Reaction.

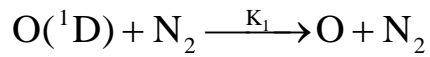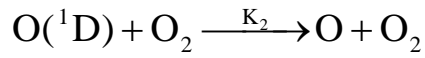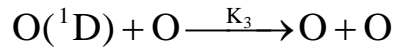

$$\Rightarrow L_{\text{O}(^1\text{D})} = \{\text{K}_1[\text{N}_2] + \text{K}_2[\text{O}_2] + \text{K}_3[\text{O}] + \text{A}_{1\text{D}} + \text{A}_{2\text{D}}\}[\text{O}(^1\text{D})]$$

$$\text{Steady state: } \frac{d[\text{O}(^1\text{D})]}{dt} = 0 = P_{\text{O}(^1\text{D})} - L_{\text{O}(^1\text{D})}$$

$$\Rightarrow \mu_{\text{D}} r[\text{O}_2][\text{O}^+] = \{\text{K}_1[\text{N}_2] + \text{K}_2[\text{O}_2] + \text{K}_3[\text{O}] + \text{A}_{1\text{D}} + \text{A}_{2\text{D}}\}[\text{O}(^1\text{D})]$$

$$\Rightarrow [\text{O}(^1\text{D})] = \frac{\mu_{\text{D}} r[\text{O}_2][\text{O}^+]}{\text{K}_1[\text{N}_2] + \text{K}_2[\text{O}_2] + \text{K}_3[\text{O}] + \text{A}_{1\text{D}} + \text{A}_{2\text{D}}}$$

Volume Emission Rate of 630.0nm:

$$I_{6300} \equiv [h\nu_{6300}] = \text{A}_{1\text{D}}[\text{O}(^1\text{D})]$$

$$I_{6300} = \frac{\text{A}_{1\text{D}} \mu_{\text{D}} r[\text{O}_2][\text{O}^+]}{\text{K}_1[\text{N}_2] + \text{K}_2[\text{O}_2] + \text{K}_3[\text{O}] + \text{A}_{1\text{D}} + \text{A}_{2\text{D}}}$$
